# Supplementary material for: 2-[18F]FDG-PET/CT in Cancer of Unknown Primary Tumor—A Retrospective Register-Based Cohort Study
Source: J Imaging. 2023 Aug 31;9(9):178. doi: 10.3390/jimaging9090178 (PMC10532746; doi:10.3390/jimaging9090178)
Supplement: Supplementary file 1 [file jimaging-09-00178-s001.zip]

Archive with 4 entries (4 files):
- ESM_1.pdf
- ESM_2.pdf
- ESM_3.pdf
- ESM_4.pdf
